# Supplementary material for: Clinical application of oral Chinese Patent Medicines in ophthalmology: a scoping review protocol
Source: HighWire-hosted journal article supplement (doi:10.1136/bmjopen-2021-059571), 2022-06-01
Supplement: bmjopen-2021-059571supp001_data_supplement.pdf [file bmjopen-2021-059571supp001_data_supplement.pdf]

### Search strategies

The clinical application of oral Chinese Patent Medicines in ophthalmology: a scoping review protocol

Kai Xu, Xing Liao, Lina Liang, Yamin Li, Ziyang Huang, Xiaoyu Li, Wei Zhou, Qianqian Zuo

The search strategies of eight databases are listed with the example of Qiming Granule for diabetic retinopathy.

Table 1 - Search terms for Embase

| Search No | Search Terms                                                                                                                                                  |
|-----------|---------------------------------------------------------------------------------------------------------------------------------------------------------------|
| 1         | 'diabetic retinopathy '/exp                                                                                                                                   |
| 2         | 'diabetic retinopathy':ab,ti OR 'diabetes retinopathy':ab,ti OR 'diabetic retinitis':ab,ti OR 'retinopathia diabetica':ab,ti OR 'retinopathy, diabetes':ab,ti |
| 3         | 2 OR 1                                                                                                                                                        |
| 4         | 'Qiming Granules':ab,ti OR 'Qiming Granule':ab,ti                                                                                                             |
| 5         | 4 AND 3                                                                                                                                                       |

Table 2 - Search terms for Web of Science

| Search No | Search Terms                                                                                       |
|-----------|----------------------------------------------------------------------------------------------------|
| 1         | Diabetic Retinopathy (Topic)                                                                       |
| 2         | Diabetic Retinopathies (Topic) or Retinopathies, Diabetic (Topic) or Retinopathy, Diabetic (Topic) |
| 3         | 2 OR 1                                                                                             |
| 4         | Qiming Granules (Topic) or Qiming Granule (Topic)                                                  |
| 5         | 4 AND 3                                                                                            |

Table 3 - Search terms for PubMed

| Search No | Search Terms                                                                                                                       |
|-----------|------------------------------------------------------------------------------------------------------------------------------------|
| 1         | "Diabetic Retinopathy"[Mesh]                                                                                                       |
| 2         | ((Diabetic Retinopathies[Title/Abstract]) OR (Retinopathies, Diabetic[Title/Abstract])) OR (Retinopathy, Diabetic[Title/Abstract]) |
| 3         | 2 OR 1                                                                                                                             |

|   |                                                                       |                                                                                                                                                                                                                                                     |
|---|-----------------------------------------------------------------------|-----------------------------------------------------------------------------------------------------------------------------------------------------------------------------------------------------------------------------------------------------|
|   |                                                                       | Retinopathies[Title/Abstract]) OR (Retinopathies, Diabetic[Title/Abstract])) OR (Retinopathy, Diabetic[Title/Abstract])) OR ("Diabetic Retinopathy"[Mesh])                                                                                          |
| 4 | (Qiming Granules[Title/Abstract]) OR (Qiming Granule[Title/Abstract]) |                                                                                                                                                                                                                                                     |
| 5 | 4 AND 3                                                               | ((Qiming Granules[Title/Abstract]) OR (Qiming Granule[Title/Abstract])) AND (((Diabetic Retinopathies[Title/Abstract]) OR (Retinopathies, Diabetic[Title/Abstract])) OR (Retinopathy, Diabetic[Title/Abstract])) OR ("Diabetic Retinopathy"[Mesh])) |

Table 4 - Search terms for Cochrane Library

| Search No | Search Terms                                              |
|-----------|-----------------------------------------------------------|
| 1         | MeSH descriptor: [Diabetic Retinopathy] explode all trees |
| 2         | (Qiming Granules):ti,ab,kw OR (Qiming Granule):ti,ab,kw   |
| 3         | #2 AND #1                                                 |

Table 5 - Search terms for Chongqing VIP Chinese Scientific Journals Database

| Search Terms                                           |
|--------------------------------------------------------|
| 题名或关键词=糖尿病视网膜病变+糖尿病性视网膜病变+糖网+消渴目病+消渴内障 AND 题名或关键词=芪明颗粒 |

Table 6 - Search terms for Chinese National Knowledge Infrastructure

| Search Terms                                                                                                 |
|--------------------------------------------------------------------------------------------------------------|
| (主题:糖尿病视网膜病变(精确)) OR (主题:糖尿病性视网膜病变(精确)) OR (主题:糖网(精确)) OR (主题:消渴目病(精确)) OR (主题:消渴内障(精确)) AND ((主题:芪明颗粒(精确))) |

Table 7 - Search terms for Chinese Biomedical Literature Database

| Search No | Search Terms                                                                                       |
|-----------|----------------------------------------------------------------------------------------------------|
| 1         | "糖尿病视网膜病变"[常用字段:智能] OR "糖尿病性视网膜病变"[常用字段:智能] OR "糖网"[常用字段:智能] OR "消渴目病"[常用字段:智能] OR "消渴内障"[常用字段:智能] |
| 2         | "芪明颗粒"[常用字段:智能]                                                                                    |

|   |               |
|---|---------------|
| 3 | (#1) AND (#2) |
|---|---------------|

Table 8 - Search terms for Wanfang Database

| Search Terms                                                   |
|----------------------------------------------------------------|
| 主题：（芪明颗粒） and 主题：（糖尿病视网膜病变 or 糖尿病性视网膜病变 or 视网 or 消渴目病 or 消渴内障） |
